# Supplementary material for: Inflammatory cytokines, placental pathology, and neurological outcomes in infants born to preterm preeclamptic mothers
Source: PubMed Central journal article supplement (PMC8592443; doi:10.1371/journal.pone.0260094), 2021-11-15
Supplement: pone.0260094.s001.pdf [file pone.0260094.s001.pdf]

**PAEDIATRIC STROKE OUTCOME MEASURE SHORT NEURO EXAM (PSOM-SNE) INFANT VERSION  
(INFANTS TERM BIRTH TO 2 YEARS)**

**IDENTIFYING DATA**

**IPSS ID#** \_\_\_\_\_ **Site:** \_\_\_\_\_ **Date of assessment** (yyyy-mm-dd): \_\_\_\_\_

**Type of Assessment:**  Initial visit  Follow-up **Location of Assessment:**  In-patient  Clinic

**INSTRUCTIONS:** Check appropriate column for each item: Abnormal; Normal or Not Done (includes not age appropriate item)

**LEVEL OF CONSCIOUSNESS**

| TEST ITEM              | Normal | Abnormal | Notes |
|------------------------|--------|----------|-------|
| Level Of Consciousness |        |          |       |

**BEHAVIOUR, MENTAL STATUS**

| TEST ITEMS                | Not Done | Normal | Abnormal | Guidelines for Scoring                                             |
|---------------------------|----------|--------|----------|--------------------------------------------------------------------|
| Activity Level            |          |        |          | Excessively quiet, shy, removed, Hyperactive, fidgety              |
| Interpersonal Interaction |          |        |          | With parents and examiner                                          |
| Cooperation               |          |        |          | Age dependent                                                      |
| Attention                 |          |        |          |                                                                    |
| Affect                    |          |        |          | Extremely shy, withdrawn totally flat, gaze avoidance, hyperactive |
| Object Permanence         |          |        |          | Test Ages 4–12 Months. Should be present by 8 Months               |

**LANGUAGE**

| TEST ITEMS           | Not Done | Normal | Abnormal | Guidelines for Scoring                                                                                                                                                                                               |
|----------------------|----------|--------|----------|----------------------------------------------------------------------------------------------------------------------------------------------------------------------------------------------------------------------|
| Language Development |          |        |          | <b>Normal:</b><br><b>0-4 mos.</b> - Coos <b>4-12 mos.</b> - babbles<br><b>by 12 mos.</b> - 1-2 words <b>12-18 mos.</b> - single words<br><b>2 years.</b> - 2 word phrase <b>3 years</b> - 3 word sentence, 200 words |

**CRANIAL NERVES**

| TEST ITEMS                    | Not Done | Normal | Abnormal | Guidelines for Scoring and Notes (Describe Abnormalities)                                                                                             |
|-------------------------------|----------|--------|----------|-------------------------------------------------------------------------------------------------------------------------------------------------------|
| Visual Fields / Vision        | Right    |        |          | Facing patient at 2–3 ft encourage to stare at your eyes and tell when they see object come into view from side (or note gaze shifting toward object) |
|                               | Left     |        |          |                                                                                                                                                       |
| Pupillary Light Reflex        | Right    |        |          | Direct and Consensual                                                                                                                                 |
|                               | Left     |        |          |                                                                                                                                                       |
| Funduscopy                    | Right    |        |          | Note Abnormalities:                                                                                                                                   |
|                               | Left     |        |          |                                                                                                                                                       |
| Ocular Motility               | Right    |        |          | Move pen or red object or light smoothly from right to left and back testing full range. Watch for nystagmus or dysconjugate eye movements            |
|                               | Left     |        |          |                                                                                                                                                       |
| Optokinetic Nystagmus         | Right    |        |          | Test from 6 mos: move measuring tape slowly from right to left and back through full range encourage to 'look at the lines'                           |
|                               | Left     |        |          |                                                                                                                                                       |
| Facial Sensation              | Right    |        |          | Touch each side with light touch and cold object comparing forehead, cheek and chin R / L: watch for child's reaction                                 |
|                               | Left     |        |          |                                                                                                                                                       |
| Facial Movements              | Right    |        |          | Observe smile, observe mouth symmetry during vocalization. Listen to speech quality, observe eye closure for symmetry                                 |
|                               | Left     |        |          |                                                                                                                                                       |
| Hearing                       | Right    |        |          | Finger-rub for infants or whisper at 2 - 3 feet away.                                                                                                 |
|                               | Left     |        |          |                                                                                                                                                       |
| Swallow                       |          |        |          |                                                                                                                                                       |
| Palate and gag                | Right    |        |          | Observe during open mouth crying or demonstrate with tongue protruded 'Say 'ahhhhh.' Listen to voice quality                                          |
|                               | Left     |        |          |                                                                                                                                                       |
| Trapezius Strength            | Right    |        |          | Test Shoulder Shrug                                                                                                                                   |
|                               | Left     |        |          |                                                                                                                                                       |
| Tongue Movements Side-To-Side | Right    |        |          |                                                                                                                                                       |
|                               | Left     |        |          |                                                                                                                                                       |

## INFANT GROSS MOTOR

### Infant Primitive Reflexes (Test Only Infants <12 months of age)

| TEST ITEMS                    | Not Done | Normal | Abnormal | Guidelines for Scoring                                                                             |
|-------------------------------|----------|--------|----------|----------------------------------------------------------------------------------------------------|
| Sucking Reflex                |          |        |          |                                                                                                    |
| Rooting Reflex                |          |        |          |                                                                                                    |
| Palmer Grasp Reflex           | Right    |        |          | ≤ 4 months                                                                                         |
|                               | Left     |        |          |                                                                                                    |
| Plantar Grasp Reflex          | Right    |        |          | ≤ 12 months                                                                                        |
|                               | Left     |        |          |                                                                                                    |
| Stepping and Placing Reflexes | Right    |        |          | ≤ 6 months                                                                                         |
|                               | Left     |        |          |                                                                                                    |
| Asymmetric Tonic Neck Reflex  |          |        |          | ≤ 6 months                                                                                         |
| Moro Reflex                   | Right    |        |          | ≤ 6 months                                                                                         |
|                               | Left     |        |          |                                                                                                    |
| Parachute Reflex              | Right    |        |          | <b>Symmetry Norms:</b><br>Downward By ≤ 6 months<br>Sideways By ≤ 8 months<br>Forward By 12 months |
|                               | Left     |        |          |                                                                                                    |

### Developmental Gross Motor

**Test Only:** Infants <2 Yrs OR Children ≥2 Yrs without Independent Ambulatory Motor Function

| TEST ITEMS                                     | Not Done | Normal | Abnormal | Guidelines for Scoring |
|------------------------------------------------|----------|--------|----------|------------------------|
| Central Tone: Head lag on 'pull-to-sit'        |          |        |          |                        |
| Central Tone: Slip Thru On Vertical Suspension |          |        |          |                        |
| Central Tone: Tone on Ventral Suspension       |          |        |          |                        |
| Rolls Over (Front To Back)                     |          |        |          | By ≤ 5 Mos.            |
| Rolls Over (Back To Front)                     |          |        |          | By ≤ 5 Mos.            |
| Sits Alone                                     |          |        |          | By ≤ 8 Mos.            |
| Moves From Laying To Sitting Unassisted        |          |        |          | ≤ 10 Mos.              |
| Weight-Bearing, Supported                      |          |        |          |                        |
| Walks Holding On                               |          |        |          | By ≤ 15 Mos.           |
| Walks Independently                            |          |        |          | By < 16 Mos.           |

## MOTOR TESTING

|                           | POWER    |        |          | TONE     |        |          | INVOLUNTARY MOVEMENTS* |        |          |
|---------------------------|----------|--------|----------|----------|--------|----------|------------------------|--------|----------|
|                           | Not Done | Normal | Abnormal | Not Done | Normal | Abnormal | Not Done               | Normal | Abnormal |
| <b>Neck/Trunk Muscles</b> |          |        |          |          |        |          |                        |        |          |
| <b>Right Arm</b>          |          |        |          |          |        |          |                        |        |          |
| Proximal                  |          |        |          |          |        |          |                        |        |          |
| Distal                    |          |        |          |          |        |          |                        |        |          |
| <b>Left Arm</b>           |          |        |          |          |        |          |                        |        |          |
| Proximal                  |          |        |          |          |        |          |                        |        |          |
| Distal                    |          |        |          |          |        |          |                        |        |          |
| <b>Right Leg</b>          |          |        |          |          |        |          |                        |        |          |
| Proximal                  |          |        |          |          |        |          |                        |        |          |
| Distal                    |          |        |          |          |        |          |                        |        |          |
| <b>Left Leg</b>           |          |        |          |          |        |          |                        |        |          |
| Proximal                  |          |        |          |          |        |          |                        |        |          |
| Distal                    |          |        |          |          |        |          |                        |        |          |

**\*Type of Involuntary Movements Seen**  
 Check all that are present

| TYPE               | ?Present |
|--------------------|----------|
| Limb Tremor        |          |
| Choreoathetosis    |          |
| Dystonic Posturing |          |
| Tics               |          |

### TENDON REFLEXES

| TEST ITEMS            |       | Not Done | Normal | Abnormal | Guidelines for Scoring               |
|-----------------------|-------|----------|--------|----------|--------------------------------------|
| Biceps                | Right |          |        |          |                                      |
|                       | Left  |          |        |          |                                      |
| Brachioradialis       | Right |          |        |          |                                      |
|                       | Left  |          |        |          |                                      |
| Triceps               | Right |          |        |          |                                      |
|                       | Left  |          |        |          |                                      |
| Knee Jerk             | Right |          |        |          |                                      |
|                       | Left  |          |        |          |                                      |
| Quadriceps            | Right |          |        |          |                                      |
|                       | Left  |          |        |          |                                      |
| Ankle Jerk            | Right |          |        |          |                                      |
|                       | Left  |          |        |          |                                      |
| Babinski              | Right |          |        |          | Upgoing toe is normal up to one year |
|                       | Left  |          |        |          |                                      |
| Elicited ankle clonus | Right |          |        |          |                                      |
|                       | Left  |          |        |          |                                      |

### FINE MOTOR / COORDINATION

| TEST ITEMS                |       | Not Done | Normal | Abnormal | Guidelines for Scoring                                                                                                                  |
|---------------------------|-------|----------|--------|----------|-----------------------------------------------------------------------------------------------------------------------------------------|
| Pincer Grasp              | Right |          |        |          | Encourage to pick up small 2–3 mm. ball of rolled up paper                                                                              |
|                           | Left  |          |        |          |                                                                                                                                         |
| Rapid Tap Index Finger    | Right |          |        |          | Test from ~18 months: <b>"As fast as you can"</b> demonstrate index finger repetitively tapping with hands placed palms down on surface |
|                           | Left  |          |        |          |                                                                                                                                         |
| Reaching for object       | Right |          |        |          | Observe for unusual or asymmetric tremor on reaching for object                                                                         |
|                           | Left  |          |        |          |                                                                                                                                         |
| Sitting/ Standing Balance |       |          |        |          |                                                                                                                                         |

### SENSORY

| TEST ITEMS        |       | Not Done | Normal | Abnormal | Guidelines for Scoring |
|-------------------|-------|----------|--------|----------|------------------------|
| Light Touch       | Right |          |        |          |                        |
|                   | Left  |          |        |          |                        |
| Pin Prick or Cold | Right |          |        |          |                        |
|                   | Left  |          |        |          |                        |

### GAIT

Test Only if  $\geq$  12 months and walking without support

| TEST ITEMS   | Not Done | Normal | Abnormal | Guidelines for Scoring |
|--------------|----------|--------|----------|------------------------|
| Gait Walking |          |        |          | By $\geq$ 16 mos.      |
| Gait Running |          |        |          | By 2 yrs of age        |

## SCORING SHEET FOR PSOM-SNE

### SUMMARY OF IMPRESSIONS

After completing the PSOM-NE or equivalent detailed neurologic examination, summarize and grade your impressions in the following categories:

**A. Sensorimotor Deficit (ANY motor or sensory abnormality including Cranial Nerve Deficits, Visual, and Hearing deficits)**

|                                           | <u>R side</u> | <u>L side</u> |
|-------------------------------------------|---------------|---------------|
| Not Done                                  | n/t           | n/t           |
| None                                      | 0             | 0             |
| Mild but no impact on function            | 0.5           | 0.5           |
| Moderate with some functional limitations | 1             | 1             |
| Severe or Profound with missing function  | 2             | 2             |

**Select the Sensorimotor Deficits You Observed (select all that apply)**

- Global developmental delay                       Global hypotonia or hypertonia  
 Hemiparesis     Hemifacial weakness     Hemiataxia     Dysarthria     Other Motor deficit  
 Hemisensory deficit     Other Sensory deficit  
 Difficulty with vision  
 Difficulty with drinking, chewing or swallowing  
 Other, describe: \_\_\_\_\_

**B. Language Deficit – Production (including dysarthria)**

|                                           |     |
|-------------------------------------------|-----|
| Not Done                                  | n/t |
| None                                      | 0   |
| Mild but no impact on function            | 0.5 |
| Moderate with some functional limitations | 1   |
| Severe or Profound with missing function  | 2   |

**Describe the Language Production Deficits You Observed Here:** \_\_\_\_\_

**C. Language Deficit - Comprehension**

|                                           |     |
|-------------------------------------------|-----|
| Not Done                                  | n/t |
| None                                      | 0   |
| Mild but no impact on function            | 0.5 |
| Moderate with some functional limitations | 1   |
| Severe or Profound with missing function  | 2   |

**Describe The Language Comprehension You Observed Here:** \_\_\_\_\_

**D. Cognitive or Behavioural Deficit (specify which)     Cognitive                       Behavioural**

|                                           |     |
|-------------------------------------------|-----|
| Not Done                                  | n/t |
| None                                      | 0   |
| Mild but no impact on function            | 0.5 |
| Moderate with some functional limitations | 1   |
| Severe or Profound with missing function  | 2   |

**Describe The Cognitive or Behavioural Deficits You Observed Here:** \_\_\_\_\_

**TOTAL SCORING:** \_\_\_\_\_ /10

1. Have you/your child recovered completely from the stroke?     Yes     No
2. Does your child need extra help with day-to-day activities compared to other children their age?     Yes     No
3. Has the stroke affected you/your child's emotional state, behavior and feelings about his/herself?                       Yes     No  
 Does your child show any signs of depression?     Yes     No
4. Does the child use aids or assistive devices (e.g. splints, braces)?     Yes     No    Specify: \_\_\_\_\_
